# Supplementary material for: Proliferative exhausted CD8+ T cells exacerbate long-lasting anti-tumor effects in human papillomavirus-positive head and neck squamous cell carcinoma
Source: eLife. 2023 Feb 22;12:e82705. doi: 10.7554/eLife.82705 (PMC9946444; doi:10.7554/eLife.82705)
Supplement: Supplementary file 1. [file elife-82705-supp1.xlsx]

## Sheet: Supplementary File 1
Patients	Gender	Age	T	N	M	Stage	HPV status	Sample ID	Sample	Method
P_01	male	73	T2	N1	M0	I	HPV+	scRNA_Ca1_P01	Tumor	single-cell RNA seq
								scRNA_N1_P01	Normal adjacent	single-cell RNA seq
								scRNA_T1_P01	Tumor infiltrated T cells	single-cell RNA seq
								scTCR_Ca1_P01	Tumor	single-cell TCR seq
								scTCR_N1_P01	Normal adjacent	single-cell TCR seq
								scTCR_T1_P01	Tumor infiltrated T cells	single-cell TCR seq
P_02	male	58	T2	N2	M0	II	HPV+	scRNA_N2_P02	Normal adjacent	single-cell RNA seq
								scTCR_N2_P02	Normal adjacent	single-cell TCR seq
P_03	Female	52	T2	N2b	M0	IVA	HPV-	scRNA_T2_P03	Tumor infiltrated T cells	single-cell RNA seq
								scRNA_N3_P03	Normal adjacent	single-cell RNA seq
								scTCR_T2_P03	Tumor infiltrated T cells	single-cell TCR seq
								scTCR_N3_P03	Normal adjacent	single-cell TCR seq
								mIF1_P03	Tumor	multiplex immunofluorescence
P_04	male	48	T3	N2	M0	II	HPV+	scRNA_T3_P04	Tumor infiltrated T cells	single-cell RNA seq
								scTCR_T3_P04	Tumor infiltrated T cells	single-cell TCR seq
P_05	male	63	T4	N0	M0	III	HPV+	scRNA_T4_P05	Tumor infiltrated T cells	single-cell RNA seq
								scRNA_N4_P05	Normal adjacent	single-cell RNA seq
								scTCR_T4_P05	Tumor infiltrated T cells	single-cell TCR seq
								scTCR_N4_P05	Normal adjacent	single-cell TCR seq
P_06	male	68	T4a	N2b	M0	IV	HPV-	scRNA_T5_P06	Tumor infiltrated T cells	single-cell RNA seq
								scTCR_T5_P06	Tumor infiltrated T cells	single-cell TCR seq
								mIF2_P06	Tumor	multiplex immunofluorescence
P_07	Female	77	T4a	N2b	M0	IV	HPV-	scRNA_T6_P07	Tumor infiltrated T cells	single-cell RNA seq
								scTCR_T6_P07	Tumor infiltrated T cells	single-cell TCR seq
								mIF3_P07	Tumor	multiplex immunofluorescence
P_08	male	73	T4b	N1	M0	ⅣB	HPV-	ST_P08	Tumor	Spatial transcriptome sequencing
P_09	male	71	T3	N2c	M0	IVA	HPV-	scRNA_T7_P09	Tumor infiltrated T cells	single-cell RNA seq
								scTCR_T7_P09	Tumor infiltrated T cells	single-cell TCR seq
								mIF4_P09	Tumor	multiplex immunofluorescence
P_10	male	64	T4a	N1	M0	III	HPV-	scRNA_Ca2_P10	Tumor	single-cell RNA seq
								scRNA_N5_P10	Normal adjacent	single-cell RNA seq
								scTCR_Ca2_P10	Tumor	single-cell TCR seq
								scTCR_N5_P10	Normal adjacent	single-cell TCR seq
								mIF5_P10	Tumor	multiplex immunofluorescence
P_11	male	57	T3	N1	M0	II	HPV+	Fc1_P11	Tumor	flow cytometry
P_12	Female	71	T4a	N0	M0	IVA	HPV-	Fc2_P12	Tumor	flow cytometry
P_13	male	48	T4a	N2b	M0	IVA	HPV-	Fc3_P13	Tumor	flow cytometry
P_14	male	47	T2	N1	M0	I	HPV+	Fc4_P14	Tumor	flow cytometry
P_15	male	57	T3	N1	M0	II	HPV+	Fc5_P15	Tumor	flow cytometry
P_16	male	54	T4b	N2b	M0	IVB	HPV-	Fc6_P16	Tumor	flow cytometry
P_17	Female	70	T2	N0	M0	II	HPV-	Fc7_P17	Tumor	flow cytometry
P_18	male	63	T2	N1	M0	II	NA	Fc8_P18	Tumor	flow cytometry
P_19	male	59	T4	N0	M0	II	NA	Fc9_P19	Tumor	flow cytometry
P_20	male	45	T4	N1	M0	III	NA	Fc10_P20	Tumor	flow cytometry
P_21	male	56	cT4b	N2b	M0	IVB	NA	Fc11_P21	Tumor	flow cytometry
P_22	male	69	T3	N1	M0	III	NA	Fc12_P22	Tumor	flow cytometry
P_23	male	75	T4	N1	M0	III	HPV+	Fc13_P23	Tumor	flow cytometry
P_24	male	75	T4	N0	M0	III	HPV+	Fc14_P24	Tumor	flow cytometry
